# Supplementary material for: A RNA-Seq Analysis of the Response of Photosynthetic System to Low Nitrogen Supply in Maize Leaf
Source: MDPI journal article supplement (doi:10.3390/ijms18122624), 2017-12-05
Supplement: s1 [file s1]

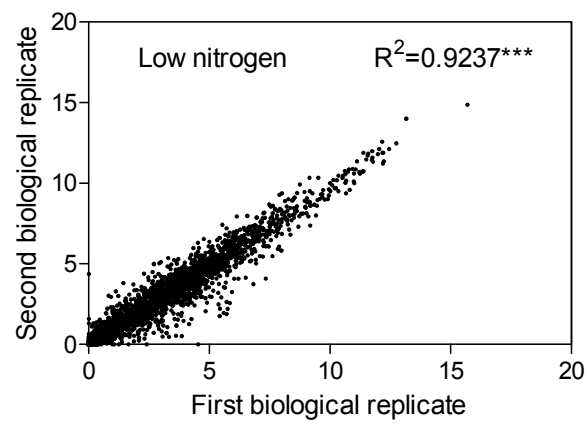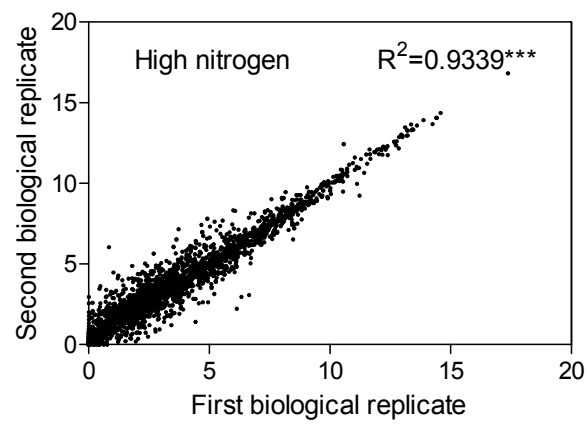

**Figure 1S. Correlation between biological replicates.** High nitrogen (HN): 4 mM  $\text{Ca}(\text{NO}_3)_2$ ; Low nitrogen (LN) : 40  $\mu\text{M}$   $\text{Ca}(\text{NO}_3)_2$ .
